# Supplementary material for: Unraveling the Physiological Mechanisms Underlying the Intracultivar Variability of Water Use Efficiency in Vitis vinifera “Grenache”
Source: MDPI journal article supplement (doi:10.3390/plants11213008), 2022-11-07
Supplement: s1 [file s1]

**Table S1.** Meteorological conditions during the experimental seasons (May–September) of 2020 and 2021 in Mallorca, Balearic Islands, Spain.

| Year | Month     | Temperature (°C) | Relative humidity (%) | Rainfall (mm) | ET <sub>o</sub> (mm) |
|------|-----------|------------------|-----------------------|---------------|----------------------|
| 2020 | May       | 18.3 ± 0.1       | 69.7 ± 0.2            | 46.2          | 126.8                |
|      | June      | 29.2 ± 0.1       | 67.7 ± 0.3            | 228.8         | 150.1                |
|      | July      | 25.9 ± 0.1       | 63.6 ± 0.3            | 10.2          | 175.2                |
|      | August    | 26.3 ± 0.1       | 84.5 ± 0.2            | 12.4          | 141.8                |
|      | September | 24.3 ± 0.1       | 74.3 ± 0.1            | 29.6          | 90.8                 |
| 2021 | May       | 20.3 ± 0.3       | 63.7 ± 0.2            | 18.8          | 134.6                |
|      | June      | 22.4 ± 0.5       | 66.1 ± 0.3            | 29.2          | 144.7                |
|      | July      | 26.5 ± 0.4       | 56.9 ± 0.3            | 3.4           | 153.5                |
|      | August    | 26.2 ± 0.3       | 64.2 ± 0.2            | 22.0          | 135.9                |
|      | September | 22.2 ± 0.4       | 68.2 ± 0.3            | 53.6          | 87.4                 |

Temperature and relative humidity are daily averages, while rainfall and reference evapotranspiration (ET<sub>o</sub>) are monthly totals.

**Table S2.** Linear regressions between stomatal conductance ( $g_s$ ) and stem water potential ( $\Psi_{\text{stem}}$ ) of all genotypes across 2020 and 2021.

| Genotype  | $g_s - \Psi_{\text{stem}}$ |        |    |                |         |
|-----------|----------------------------|--------|----|----------------|---------|
|           | y                          | a      |    | r <sup>2</sup> | p-value |
| ARA-24    | 0.5077                     | 0.3427 | ab | 0.77           | <0.0001 |
| EVENA-11  | 0.4615                     | 0.332  | ab | 0.63           | <0.0001 |
| EVENA-13  | 0.4802                     | 0.3228 | ab | 0.79           | <0.0001 |
| EVENA-14  | 0.4644                     | 0.3096 | ab | 0.63           | <0.0001 |
| EVENA-15  | 0.4707                     | 0.329  | ab | 0.64           | <0.0001 |
| ENTAV-136 | 0.4801                     | 0.3264 | ab | 0.73           | <0.0001 |
| ENTAV-435 | 0.5177                     | 0.3828 | a  | 0.64           | <0.0001 |
| RJ21      | 0.4658                     | 0.2979 | b  | 0.61           | <0.0001 |
| VNQ       | 0.5662                     | 0.4019 | a  | 0.80           | <0.0001 |

“y” indicates the intercept, “a” the slope of the regression; “r<sup>2</sup>” the correlation coefficients and “p-values” the significance of the regressions. Different letters indicate significant differences between regressions (p<0.05).

**Table S3.** Linear regressions between the natural logarithm of intrinsic water use efficiency (WUE<sub>i</sub>) and stomatal conductance ( $g_s$ ) of all genotypes across 2020 and 2021.

| Genotype  | Ln WUE <sub>i</sub> - $g_s$ |         |    |                |         |
|-----------|-----------------------------|---------|----|----------------|---------|
|           | y                           | a       |    | r <sup>2</sup> | p-value |
| ARA-24    | 4.9964                      | -3.2214 | b  | 0.82           | <0.0001 |
| EVENA-11  | 4.9985                      | -3.322  | ab | 0.75           | <0.0001 |
| EVENA-13  | 5.1129                      | -4.1424 | a  | 0.88           | <0.0001 |
| EVENA-14  | 5.0972                      | -3.9286 | ab | 0.86           | <0.0001 |
| EVENA-15  | 5.0614                      | -3.5553 | ab | 0.87           | <0.0001 |
| ENTAV-136 | 5.0824                      | -3.6546 | ab | 0.90           | <0.0001 |
| ENTAV-435 | 5.0059                      | -3.4066 | ab | 0.91           | <0.0001 |
| RJ21      | 5.1039                      | -3.9491 | ab | 0.94           | <0.0001 |
| VNQ       | 5.0199                      | -3.3842 | ab | 0.88           | <0.0001 |

“y” indicates the intercept, “a” the slope of the regression; “r<sup>2</sup>” the correlation coefficients and “p-values” the significance of the regressions. Different letters indicate significant differences between regressions (p<0.05).
